1 **Where does it go? The fate of thiocyanate in the aquarium water**  
2 **and blood plasma of *Amphiprion clarkii* after exposure to cyanide.**

3  
4 J. Alexander Bonanno<sup>1</sup>, Nancy E. Breen<sup>2</sup>, Michael F. Tlusty<sup>1</sup>, Lawrence J. Andrade<sup>3</sup> and Andrew  
5 L. Rhyne<sup>4</sup>

6  
7 <sup>1</sup>School for the Environment, University of Massachusetts at Boston, Boston, MA, USA

8 <sup>2</sup>Department of Chemistry, Roger Williams University, Bristol, RI, USA

9 <sup>3</sup>Dominion Diagnostics, North Kingstown, RI, USA

10 <sup>4</sup>Department of Biology, Marine Biology, and Environmental Science, Roger Williams  
11 University, Bristol, RI, USA

12  
13 Corresponding Author:  
14 Andrew L. Rhyne  
15 Department of Biology, Marine Biology, and Environmental Science  
16 One Old Ferry Road  
17 Bristol, RI 02809  
18 Email address: arhyne@rwu.edu

19  
20 **ABSTRACT**

21 The illegal practice of cyanide fishing continues to damage coral reef ecosystems throughout the  
22 Indo-Pacific. To combat this destructive fishing method, a simple, reliable test to detect whether  
23 or not a fish has been captured using cyanide (CN) is needed. This study analyzed the  
24 toxicokinetics of acute, pulsed CN exposure as well as chronic exposure to thiocyanate (SCN),  
25 the major metabolite of CN, in the clownfish species, *Amphiprion clarkii*. Fish were pulse  
26 exposed to 50 ppm CN for 20 or 45 seconds or chronically exposed to 100 ppm SCN for 12 days.  
27 Blood plasma levels of SCN were measured following derivatization to SCN-bimane using an  
28 Acuity UPLC I-Class and Q-Exactive hybrid Quadrupole-Orbitrap HRAM mass spectrometer

29 or directly by HPLC-UV. After exposure to CN, depending on the duration of exposure, SCN  
30 plasma levels reached a maximum concentration (300–470 ppb) 0.13–0.17 days after exposure,  
31 had a 0.1 to 1.2 day half-life, and often did not return to baseline levels. The half-life of plasma  
32 SCN after direct exposure to SCN was found to be 0.13 days, similar to the CN exposure, and  
33 that SCN in the holding water would often drop below detection. Finally, we observed that when  
34 a fish, never exposed to SCN, was placed in aquarium water spiked with SCN, there was a steady  
35 decrease in aqueous SCN concentration over 24 hours until it could no longer be detected. This  
36 pattern was repeated with a second sequential dose. These results demonstrate that *A. clarkii* do  
37 not excrete SCN after CN exposure, but in fact can absorb low concentrations of SCN from  
38 water, refuting several publications. It appears that *A. clarkii* exhibit a classic two compartment  
39 model where SCN is rapidly eliminated from the blood plasma and is distributed throughout the  
40 tissue but not excreted in their urine. This study demonstrates that SCN may be used as a marker  
41 of CN exposure only if fish are tested shortly after exposure. There is species specific variability  
42 in response to CN, and studies of other taxa need to be performed before this test can be  
43 deployed in the field.

44

## 45 INTRODUCTION

46 Coral reef ecosystems are being stressed to their tipping point largely by climate change, but  
47 other anthropogenic activities are playing a role in their destruction including illegal fishing  
48 practices (Burke et al. 2011; Hughes et al. 2017). This is critical as coral reefs globally boast the  
49 greatest diversity of marine life anywhere (Reaka-Kudla 1997; Bruno & Selig 2007). The  
50 biodiversity found in coral reefs make them one of the most valuable ecosystems on our planet,  
51 yet they are also one of the most threatened (Hughes et al. 2017).

52 One of the risks posed to coral reefs is the illegal fishing practice of using cyanide (CN) to  
53 capture reef fish. This practice is most often used for either the marine aquarium trade (MAT) or  
54 the live reef food fish trade (LRFT) and primarily occurs in the Indo-Pacific region where 75  
55 percent of all coral reefs are located (Rubec 1986; Barber & Pratt 1997; Graham 2001; Bruno &  
56 Selig 2007; Calado et al. 2014; Davis et al. 2017; Losada & Bersuder 2017). Cyanide fishing  
57 most often involves dissolving tablets of either potassium or sodium cyanide in a squirt bottle  
58 filled with seawater. The concentrated CN solution is then squirted onto the fish that inhabit the

59 reef and in crevices in the reef where the fish hide. At sublethal doses, which likely vary  
60 depending on the size and species of the fish, CN temporally paralyzes the fish, immobilizing  
61 them for easy capture. Cyanide has been used as a stunning agent to collect fish for over 60 years  
62 (Lewis & Tarrant Jr 1960; Bellwood 1981; Pearce 2003; Frey 2013). Despite being illegal, this  
63 fishing practice continues to be used throughout the region. Fishermen rely on the middlemen,  
64 who provide cyanide, food, boats, and minimal pay in return for high volumes of cyanide-caught  
65 fish (Rubec et al. 2001). Policing against this fishing method is difficult, as there is no easy and  
66 definitive way to determine if a fish has been captured using CN. As a result, law enforcement is  
67 challenging if not impossible (reviewed by Losada & Bersuder, 2017).

68 The squirt bottle method of CN delivery makes it difficult for collectors to control the amount of  
69 solution dispensed, making dosing vary greatly. As CN is nonselective, and dosing is not precise,  
70 this method often kills both the targeted species and non-targeted species in the squirt zone (Frey  
71 2013). Even when fish survive the exposure, there are reports of increased fish mortality post-  
72 capture associated with this fishing practice (Pyle 1993; Hall & Bellwood 1995; Cervino et al.  
73 2003). Furthermore, stony corals, which are an important structural component of coral reef  
74 ecosystems, are often damaged from exposure to CN during the fishing process (Jones & Hoegh-  
75 Guldborg 1999; Cervino et al. 2003). Once the fish are stunned, fishermen also may break stony  
76 corals to gain access to the fish, increasing the long-term damage to reefs (Bruckner & Roberts  
77 2008).

78 Attempts to curtail the use of CN as a capture method via post-capture testing have not been  
79 successful (Erdmann 1999; Dalabajan 2005). The Cyanide Detection Test (CDT), which uses a  
80 CN ion-selective electrode to measure CN found in tissues of fish, was developed by the  
81 International Marinelifelife Alliance (IMA) and the Philippines Bureau of Fisheries and Aquatic  
82 Resources (BFAR). It was adopted in the Philippines in the 1990s (Barber & Pratt 1997;  
83 Manipula et al. 2001). The CDT test was never validated for testing for CN collected fish, and it  
84 was suggested that the test was unreliable as an indicator of CN exposure primarily due to  
85 interferences resulting in false positives (Mak et al. 2005; Rubec et al. 2008; Balboa 2017).  
86 Bruckner and Roberts (2008) thoroughly documented the short comings of the IMA CDT. The  
87 test required lethal sampling, was time-consuming, labor-intensive, and was never properly field-  
88 tested and verified. Other CN detection methods have been proposed (Mak et al. 2005), but the

89 rapid detoxification of CN is the major difficulty in detecting CN exposure. Any test for CN  
90 caught fish must be administered very soon, likely within hours, after exposure (Logue et al.  
91 2010).

92 As an alternative to detecting CN directly, thiocyanate (SCN), the major metabolite of CN  
93 exposure, can be used as an indicator of CN exposure (Youso et al. 2012). In mammals, the CN  
94 detoxification pathway is well established. Two sulfur-transferases, rhodanese, and 3-  
95 mercaptopyruvate sulfurtransferase are responsible for catalyzing the formation of SCN from CN  
96 by sulfuration (Day et al. 2018), and SCN is eliminated in the urine by the kidneys. In marine  
97 fish, the method of elimination has not yet been determined, but Vaz et al. (2012) speculated a  
98 similar pathway to mammals. In a now refuted study, Vaz et al. (2012) claimed that a possible  
99 way to test for CN exposure in marine fish could be to detect SCN in the aquarium water of  
100 exposed fish. The authors claimed that the aquarium water contained the excreted metabolite  
101 SCN in sufficient quantity for detection. However, recovery of SCN from aquarium water as a  
102 test for CN exposure has never been replicated even though multiple labs have attempted to do  
103 so (Herz et al. 2016; Breen et al. 2018; Murray et al. 2020). In fact, a mass balance calculation  
104 demonstrated that the SCN levels reported by Vaz et al. (2012) were not possible because the CN  
105 dose needed to produce the reported amount of SCN is an order of magnitude higher than all the  
106 known LD50s in vertebrate species (Breen et al. 2018).

107 With the aquarium water test outside of the realm of possibility from a mass balance perspective,  
108 testing for SCN in bodily fluids of exposed marine fish is the next logical step. Indeed, elevated  
109 levels of SCN in the plasma of a marine fish after acute pulsed exposure to CN have been  
110 recently reported (Breen et al. 2019). SCN in the blood plasma of the laboratory cultured marine  
111 fish *Amphiprion ocellaris* was observed to be above control levels up to 41 days post exposure to  
112 CN. This study reported an initial fast elimination rate of SCN in blood plasma followed by a  
113 much slower elimination rate as evidenced by long residence times of low levels of SCN above  
114 that found in the controls. Breen et al. (2019) speculated that the observation of both a fast and  
115 slow elimination rate might be due to multiple elimination pathways in marine fish. These rates  
116 could also be governed by the availability of sulfur donors and the rate of diffusion from organs  
117 and tissues with limited blood flow (Day et al. 2018).

118 Breen et al. (2019) were the first to report the SCN concentration in the plasma of a marine fish  
119 following CN exposure. The report was for a single species and the species used was from an  
120 aquacultured stock with limited genetic diversity within the replicate fish. Over 2,300  
121 documented reef fish taxa of various sizes are traded in the MAT (Rhyne et al. 2017) and while  
122 the *A. ocellaris* work was a vital first step, the species dependent and fish size dependent  
123 variation of CN absorption and elimination is not known. Along with extending this work to  
124 other species, endogenous levels of SCN in marine fish must be known before any specific test  
125 that relies on SCN as a marker for CN exposure can be considered for widespread use.

126 In the present study, we report similar experiments to our previous CN toxicokinetic work using  
127 a congeneric clownfish species (*Amphiprion clarkii*), the same species used by Vaz et al. (2012).  
128 Here, *A. clarkii* were exposed to both CN and SCN and the rate of elimination of SCN from the  
129 blood plasma following exposure was determined by UPLC-MS and HPLC-UV. The  
130 toxicokinetics of SCN after pulsed exposure to CN is reported, as well as after chronic SCN  
131 exposure. In addition to testing the blood plasma, the aquarium water of *A. clarkii* was tested for  
132 SCN during depuration after chronic exposure to high concentrations (100 ppm) of SCN. With  
133 chronic, high-level direct exposure to the metabolite, the possibility of detection of SCN in  
134 aquarium water during depuration via bodily fluid excretion should be drastically enhanced.

135

## 136 METHODS

### 137 **Test species and cyanide sources**

138 Experiments were approved by the Roger Williams University Institute of Animal Use and Care  
139 Committee (Approval #R180820). *A. clarkii* of approximately 6-12 months of age were cultured  
140 in captivity at Roger Williams University or Sea & Reef Aquaculture, Franklin, ME, thereby  
141 ensuring they were not collected with or previously exposed to CN (Table 1). For all  
142 experiments, the water temperature was maintained by housing fish in a temperature-controlled  
143 room or placing buckets containing fish in a warm water bath both held at 25° C. All fish were  
144 fed pelletized food (Skretting Green Granule 1 mm) once per day unless otherwise noted. Water  
145 quality was maintained through daily water changes (100%) at a salinity of 30 ppt with light  
146 aeration.

147 Table 1. Average weight ( $\pm$  1 S.D.) and sample size (n) of *Amphiprion clarkii* exposed to 50 ppm  
148 CN for either 20 or 45 seconds across 2 trials and 100 ppm for 12 day. There were two groups  
149 (small/large) of *Amphiprion clarkii* used for CN 2 trial however fish size did not affect SCN half-  
150 life.

| Trial | Exposure Time | Dose (ppm) | Time Sampled Post Exposure (days) | n  | Average Weight (grams)                                               |
|-------|---------------|------------|-----------------------------------|----|----------------------------------------------------------------------|
| CN 1  | 20 s          | 50         | 13                                | 44 | 3.07 $\pm$ 0.62                                                      |
| CN 1  | 45s           | 50         | 13                                | 48 | 3.54 $\pm$ 0.78                                                      |
| CN 2  | 45 s          | 50         | 72                                | 41 | 12.84 $\pm$ 9.37<br>Small: 5.06 $\pm$ 1.33<br>Large: 21.0 $\pm$ 6.77 |
| SCN 1 | 12 d          | 100        | 16                                | 37 | 6.09 $\pm$ 2.72                                                      |

151

## 152 Exposures

153 For CN treatments, fish were exposed to a solution of 50 ppm CN (NaCN, Sigma 380970) for 20  
154 s or 45 s across two separate trials (Table 1). Ten to 12 fish were placed in a basket, and  
155 immersed in the CN solution for the pre-determined time. Post-exposure, the fish were rinsed by  
156 transferring the basket containing the fish to two successive saltwater baths from the same source  
157 and at a salinity of 30 ppt. After rinsing, fish were housed by their exposure groups in round, 20  
158 L polycarbonate tanks containing filtered saltwater with light aeration. Two trials of CN  
159 exposures were carried out. The first examined the SCN concentration in plasma for 13 days post  
160 exposure. Collection times were 1, 3, 6, 8, and 15 hours and 1, 2, 3, 7, 12 and 13 days post-  
161 exposure. The second served to determine how long the SCN concentration in the plasma of  
162 exposed fish remained above control levels. Collection times were 0.17, 0.5, 2, 7, 18, 50, and 72  
163 days post-exposure. Plasma was also collected from a total of 22 control fish not exposed to CN  
164 across the two trials.

165 For the SCN treatment, fish were exposed to 100 ppm SCN (NaSCN, Sigma 467871) for 12 days  
166 (Table 1). Fish were housed in three separate round, 20 L polycarbonate tanks holding 12-13 fish  
167 each and 15 L of saltwater and fed daily. Complete water changes were performed daily. After  
168 12 days, the fish were rinsed thoroughly by the treatment group in three consecutive saltwater  
169 baths in an attempt to remove all SCN from the surface of the fish. After rinsing, the fish were  
170 housed in the same groups as exposure in three separate 20 L polycarbonate tanks for depuration.  
171 Post-exposure tanks and fish were maintained as above. Once depuration was initiated, fish were  
172 sampled at 1, 2, 4, 8, and 16, hours and 1, 3 and 16 days. The aquarium water was also sampled  
173 over the first 48 hours as a pre-screen for the presence of excreted SCN.

174

### 175 **SCN in Aquarium Water**

176 *Amphiprion clarkii* (n = 10) were exposed to 100 ppm SCN for 12 days in a 20 L polycarbonate  
177 tank as described above. To begin the depuration period, fish were rinsed individually in three  
178 consecutive saltwater baths. Rinse bath water was changed after each fish was rinsed. After  
179 rinsing, fish were placed in individual covered beakers containing 500 mL of saltwater. As a  
180 means to check for cross contamination, another 6 beakers were held in the same area, 3  
181 containing non-exposed fish, and 3 without fish. Water samples (1 mL) were collected from each  
182 beaker before any fish were added, and then at 0, 2, 4, 8, 12, 24, 36, 48 and 72 hours after fish  
183 were added. Water changes were performed every 24 hours. Water samples were collected from  
184 each beaker before water changes during depuration. Fish were fed during exposure but not  
185 during depuration. After the final sampling at 72 hours, fish were bled and SCN blood plasma  
186 were measured as described below.

187 A second aquarium water sampling experiment was undertaken to further explore the results  
188 obtained in the first. Here, fish (n=10) with no known previous exposure to SCN, were placed in  
189 individual 500 mL beakers of saltwater spiked with SCN. In all cases, water samples were taken  
190 before spiking the water, after spiking the water with SCN and, 0, 2, 4, 8, 16, 24, (pre and post-  
191 SCN spike), and 48 hours after introducing fish to the beaker. Half the fish were bled at the 24  
192 hour sampling before spiking the water again and the other half were bled after the final  
193 sampling at 48 hours. SCN blood plasma were measured as described below.

194 **Plasma extraction**

195 At each time point fish were removed from the holding tanks for plasma collection (exact times  
196 are noted in supplemental material). Fish were heavily anesthetized with tricaine  
197 methanesulfonate (Western Chemical Inc., Ferndale, WA, USA) at a concentration of 200 ppm,  
198 buffered 2:1 with sodium bicarbonate in saltwater, and then dried and weighed on an analytical  
199 balance. Upon severance of the caudal peduncle with a #21 surgical blade, blood was collected  
200 in 40 mm heparinized microhematocrit tubes (Jorvet, Loveland, CO, USA) for fish weighing less  
201 than 4 g or 125  $\mu$ L heparinized microcapillary blood collection tubes (RAM Scientific,  
202 Nashville, TN, USA) for fish greater than 4 g. Following blood collection fish were pithed. The  
203 40 mm heparinized microhematocrit tubes were then centrifuged (ZipCombo Centrifuge, LW  
204 Scientific, Lawrenceville, GA, USA) at 3,000 rpm for two min followed by 6,000 rpm for five  
205 min to separate the red blood cells from the plasma and snapped at the plasma and red blood cell  
206 interface. The plasma was aspirated from the capillary tubes into pre-weighed 1.7 mL centrifuge  
207 tubes and then re-weighed to determine the mass of plasma collected. The 125  $\mu$ L Micro-  
208 capillary blood collection tubes were spun at 12,000 rpm for 12 min. The top plasma layer was  
209 then pipetted into a pre-weighed 1.7 mL centrifuge tube which was then reweighed to determine  
210 mass. Plasma was stored in 1.7 mL centrifuge tubes at  $-80^{\circ}$  C until they were analyzed.

211

212 **Plasma precipitation**

213 Before plasma analysis, proteins were precipitated with cold HPLC grade acetonitrile (Sigma-  
214 Aldrich). Acetonitrile was added in the ratio of 1:5 (v/v) and the solution was vortexed for 20 s  
215 and then centrifuged at 12,000 rpm for 10 min. The supernatant was pipetted to a new 1.7 mL  
216 centrifuge tube and the acetonitrile was evaporated with warm nitrogen gas in an AutoVap  
217 (Zymark) at  $70^{\circ}$  C and then reconstituted in enough HPLC grade water (Sigma-Aldrich) for a 1:5  
218 dilution and vortexed for 20 s.

219 **Thiocyanate analysis**

220 Plasma SCN concentrations were analyzed following the method of Bhandari et al. (2014) and  
221 Breen et al. (2019). Diluted plasma (50  $\mu$ L) was added to a 1.7 mL microcentrifuge tube, along  
222 with 25  $\mu$ L of 4 mM MBB (Monobromobimane, Cayman Chemical 17097) in borate buffer (0.1



223 M, pH= 8) and 10  $\mu$ L of the internal standard (200 ppb NaS<sup>13</sup>C<sup>15</sup>N) (Cambridge Isotope  
224 Labsyes). To minimize pipetting errors, larger volumes of the internal standard and the MBB  
225 were mixed in the appropriate volumes just prior to addition to the plasma and 35  $\mu$ L of the  
226 resulting solution was added to the plasma. The plasma-MBB mixture was then heated to 70° C  
227 for 15 minutes to form the bimane-SCN complex. Standard solutions of SCN (10.0 ppb–25.0  
228 ppm) were prepared in both HPLC grade water and in commercially available salmon plasma  
229 (MyBioSource inc., San Diego, CA, USA). Five-point calibration curves were prepared prior to  
230 all plasma analysis, such that the concentration of standards bracketed the expected plasma  
231 concentration.

232 Samples were analyzed for SCN-bimane concentration determination using a UPLC-MS system  
233 comprised of an Acquity UPLC<sup>®</sup> I-Class (Waters Corp., Milford, MA) and Q-Exactive<sup>™</sup> hybrid  
234 Quadrupole-Orbitrap<sup>™</sup> high-resolution accurate mass (hram) mass spectrometer (Thermo Fisher  
235 Scientific, Waltham, MA). A Kinetex 1.7  $\mu$ m XB-C18 100 Å 2.1 x 50 mm column held at 40° C  
236 was used for the gradient chromatographic separation (Phenomenex, Torrance, CA) with 10mm  
237 ammonium formate as mobile phase A and 10mm ammonium formate in methanol as mobile  
238 phase B. The flow rate was 0.25 ml/min, and gradient conditions were as follows: 10-100% B  
239 (0.00 – 3.00 min), 100% b (3.00 – 4.00 min), followed by 2. 00 min of re-equilibration time at  
240 initial conditions (total chromatographic run time 7.00 min). The Q-Exactive source conditions  
241 in esi negative mode were: sheath gas flow rate 55, auxiliary gas flow rate 15, sweep gas flow  
242 rate 2, spray voltage 4.50 kv, capillary temperature 300° C, s-lens rf level 55, auxiliary gas heater  
243 temperature 500°C. Tracefinder<sup>™</sup> 3.2 was used for data acquisition and processing. Thermo  
244 Xcalibur<sup>™</sup> 3.0 was also used for data processing.

245 The Q-Exactive acquisition method comprised a full-scan m/z 50-300 at 70,000 resolution.  
246 Analyte identity was established relative to a standard by scoring the following qualitative  
247 criteria using TraceFinder 3.2: retention time (rt  $\pm$  0.15 min), full-scan accurate mass ( $\pm$  5 ppm  
248 window), full-scan isotope pattern (scores range 0-100, and a score of  $\geq$  70 was used as the  
249 positive cutoff). Analyte quantitation was performed using the peak area ratio from the full-scan  
250 extracted ion chromatograms (xics) of the analyte (248.04992) and its internal standard  
251 (250.05031); the xic mass window was the accurate mass  $\pm$  5 ppm in all cases.

252 Analyte validation and quantification was achieved by calculation of peak area ratio  
253 (analyte/internal standard) and subsequent concentration from a linear weighted (1/x) regression  
254 of calibration standards. To accept a calibration standard, the calculated concentration must  
255 deviate  $\leq 10\%$  from the nominal concentration. The analyte response at the lower limits of  
256 quantification and detection (LLOQ and LOD) must have a signal-to-noise ratio (S/N)  $\geq 10$  and  
257 three respectively. Plasma sample concentrations for the plasma half-life experiment after  
258 chronic exposure to 100 ppm SCN were run using the HPLC-UV method used in Breen et al.  
259 (2019) originally adopted from Rong et al. (2005). Samples were later confirmed using the  
260 UPLC-MS method detailed here.

261

## 262 **Statistics and analysis**

263 The SCN half-lives and the accompanying regression statistics were determined using Origin  
264 2018 (OriginLab, Northampton, MA, USA). The data were fit using the exponential fitting tool  
265 to a single exponential decay function, ( $y = A1e^{\frac{-x}{t1}} + y_0$ ), where x is time, y is concentration,  $y_0$   
266 is the value of the function at the asymptotic limit, A1 is the concentration maximum, and t1 is  
267 the reciprocal of the first-order elimination rate constant k. None of the variables were  
268 constrained and no weighting function was used. Fits were to the full data set, the plasma  
269 concentration for each fish measured was treated as an individual sample point and were not  
270 averaged at each sampling interval prior to fitting. The reported half-life is related to the rate  
271 constant by  $t_{\frac{1}{2}} = \frac{\ln 2}{k}$ .

272

## 273 **RESULTS**

### 274 **Cyanide and Thiocyanate Exposure**

275 Shortly after the fish were immersed in the 50 ppm CN bath, they began swimming erratically  
276 and gasping for air. Once in the recovery bath, a loss of balance and respiratory activity was  
277 observed. Both 20 s and 45 s exposed fish were completely immobilized by 45 seconds after  
278 initially being dipped into CN bath. Qualitatively recovery time varied proportionally to the  
279 exposure time. For the 20 s exposure, fish returned to normal swimming behavior by

280 approximately 7 minutes while for the 45 s, normal swimming returned by approximately 17  
281 minutes. There were no mortalities in any exposure. Most exposed fish did not accept food for  
282 the first 3 days post-exposure, but then ate regularly after the third day.

283 After exposure to CN, the SCN concentration in the plasma was observed to increase quickly  
284 over the first 6 hours, and then begin to decrease rapidly over the next 24 hours. The maximum  
285 SCN was observed 0.17 days post-exposure corresponding to a concentration of  $468 \pm 29$  ppb for  
286 the 45 s exposure and 0.13 days post-exposure corresponding to a concentration of  $301 \pm 6$  ppb  
287 for the 20 s exposure (Fig. 1A, B). During the course of our first CN exposure, the SCN in the  
288 plasma remained above the control level (SCN Conc.  $> 31$  ppb  $\pm 10$ ) at our final data acquisition  
289 time of 13 days. In order to determine if and when SCN blood plasma levels reach control levels,  
290 a second exposure was carried out. In this second trial, the maximum SCN concentration of  $399$   
291 ppb  $\pm 60$  was observed 0.55 days post-exposure, and control levels were reached seven days  
292 after exposure (Fig. 1C).

293 In all three exposures, the rate of SCN elimination was fit to a single-phase exponential decay  
294 function with time constant parameters (Table 2). Regression statistics demonstrated all  
295 exposures to be statistically significant when fit to a single-phase exponential decay function  
296 (T1, 45 s:  $r^2 = 0.578$  and  $P < 0.0001$ , T1, 20 s:  $r^2 = 0.676$ ,  $P < 0.0001$ , T2:  $r^2 = 0.86$ ,  $P < 0.0001$ ).  
297 The data were fit without constraining  $y_0$ , and thus the concentration of SCN was not forced to  
298 go to zero at infinite time. This resulted in  $y_0$  values for the first trial of  $163$  ppb  $\pm 15$  for 45 s  
299 exposure and  $136$  ppb  $\pm 10$  for 20 s exposures which are above control levels and  $7.8$  ppb  $\pm 17$   
300 for the second trial which is below control levels. In the first trial, the half-lives observed are  
301 fast, dropping to a plateau level in about two days following exposure. The plateau level  
302 remained for the next 13 days and no data were obtained for times longer than 13 days for this  
303 trial. In the second trial, the control levels were reached quickly, as no plateau was observed and  
304 the resultant half-life was determined to be  $1.2 \pm 0.2$  days. In comparing the goodness of the fit  
305 from trial one to trial two, it appears that the trial two fit is much better than either of the trial one

306

307

308 Table 2. Half-life results of two acute CN exposure trials and one chronic SCN exposure with  
 309 standard errors of the fit to the function  $y = A1e^{\frac{-x}{t_1}} + y_0$  of the plasma SCN concentrations in  
 310 *Amphiprion clarkii* exposed to 50 ppm CN or 100 ppm SCN. k and  $t_{1/2}$  are calculated from the fit  
 311 parameter  $t_1$ .

| Parameter               | 45 s exposure,<br>trial 1 | 20 s exposure,<br>trial 1 | 45 s exposure,<br>trial 2 | SCN exposure     |
|-------------------------|---------------------------|---------------------------|---------------------------|------------------|
| $t_{1/2}$ (days)        | $0.10 \pm 0.04$           | $0.20 \pm 0.06$           | $1.2 \pm 0.2$             | $0.13 \pm 0.02$  |
| $Y_0$ (ppb)             | $163 \pm 15$              | $136 \pm 10$              | $7.8 \pm 17$              | $-580 \pm 1700$  |
| A1 (ppb)                | $880 \pm 390$             | $261 \pm 54$              | $468 \pm 35$              | $55000 \pm 4000$ |
| t1 (days)               | $0.14 \pm 0.06$           | $0.29 \pm 0.09$           | $1.7 \pm 0.3$             | $0.19 \pm 0.03$  |
| k (days <sup>-1</sup> ) | $6.9 \pm 2.7$             | $3.5 \pm 1.0$             | $0.58 \pm 0.09$           | $5.3 \pm 0.8$    |
| $r^2$                   | 0.55                      | 0.683                     | 0.86                      | 0.90             |
| P                       | P<0.0001                  | P<0.0001                  | P<0.0001                  | P<0.0001         |
| N                       | 48                        | 44                        | 41                        | 37               |

312  
 313 fits, based on the reported correlation coefficients and standard errors although there were fewer  
 314 early time points sampled for the second trial.

315 During the chronic SCN exposure (100 ppm, 12 days) experiments, fish behaved normally, ate  
 316 well and showed no external signs of stress. Once depuration was initiated blood plasma levels  
 317 were at a maximum ( $44 \text{ ppm} \pm 2.5$ ) at the initial sample time (0.02 days) and decreased to  
 318 average control levels ( $31 \text{ ppb} \pm 10$ ) by day 15 (Fig. 2). Fitting of the data to a single-phase  
 319 exponential decay resulted in a half-life of  $0.13 \pm 0.02$  days with an  $r^2$  value of 0.90 (Table 2).

## 320 **Aquarium Water**

321 After the first chronic exposure to 100 ppm SCN experiment, we were careful to rinse fish  
322 thoroughly before transferring to depuration tanks to remove SCN from the outer surface of the  
323 fish. In this chronic SCN exposure experiment, multiple fish were housed in 20 L buckets  
324 containing 15 L of saltwater, and this water was tested for the presence of SCN as a quick screen  
325 to see if any SCN was observable in the aquarium water. In this preliminary test, SCN levels  
326 were found to be in the 20-50 ppb range, at least for the first few hours, and SCN was only  
327 detected prior to the first water change. No SCN was detected in any of the aquarium water used  
328 as a check for contamination. After the 48 hour sampling the SCN blood plasma levels were 74  
329 ppb  $\pm$  12. and then 26 ppb  $\pm$  12 after the last sampling at 72 hours. Because of this preliminary  
330 positive result, a second more systematic study of SCN levels in aquarium water during  
331 depuration from fish exposed to chronic levels of SCN was undertaken.

332 The results of the systematic aquarium water analysis for this chronic exposure to SCN are  
333 shown in Fig. 3. Water samples were collected at time zero just prior to and immediately after  
334 introducing a fish to its holding beaker. In these water samples, in both instances, no SCN was  
335 detected. At our next sampling point, the fish had been depurating for two hours and SCN levels  
336 were found to be at their highest level of 39 ppb  $\pm$  5. From this maximum, SCN concentrations  
337 decreased continuously and, when sampled at 24 hours before the first water change, no SCN  
338 was detected in the aquarium water. Sampling continued before daily water changes for three  
339 more days but no SCN in the aquarium water was detected at these later time points.

340 This observation of an initial increase followed by an apparent loss of SCN in aquarium water  
341 over the first 24 hours of depuration after chronic SCN exposure required further study. Fish  
342 with no prior exposure to SCN were placed in beakers containing saltwater spiked with SCN and  
343 sampled for 24 hours. The concentration of SCN measured in the aquarium water with a single  
344 *A. clarkii* held in 500 mL of saltwater continually decreased from 15 ppb initially to below our  
345 detection limit at 16 hours (Fig. 4). After the first water change at 24 hours, the fresh saltwater  
346 was again spiked with SCN and the SCN concentration was found to be 15 ppb  $\pm$  1. However,  
347 once again when sampled at 24 hours the SCN concentration had dropped to below our detection  
348 limit (1 ppb). After the 24 hour sampling the SCN blood plasma levels were 429 ppb  $\pm$  164 and  
349 remained 429 ppb  $\pm$  94 after the last sampling at 48 hours.

350 DISCUSSION

351 **CN Exposure**

352 *Amphiprion clarkii* exhibited similar behavior as *A. ocellaris* when exposed to CN. Erratic  
353 behavior was followed by a loss of equilibrium and paralysis. In comparing these results with our  
354 previously reported work on *A. ocellaris*, the maximum level of SCN in blood plasma was  
355 decidedly lower for *A. clarkii* than for *A. ocellaris* while the half-lives reported were similar or  
356 smaller for *A. clarkii* depending on the exposure time (Table 3). The lower concentration of SCN  
357 in blood plasma and faster half-life suggest that *A. clarkii* take up less CN during exposure when  
358 compared to *A. ocellaris*. The half-lives reported here for marine fish are in reasonable  
359 agreement with those reported for mammals (0.21-8.3 days) (Logue et al. 2010).

360 For our first CN exposure trial the half-life of the 45 s exposure was faster than the 20 s  
361 exposure, contrary to those results for *A. ocellaris*. However, both of these half-lives have large  
362 RSDs (40%, 30%), and the argument could be made that there is no difference within their  
363 respective uncertainties. Our second 45 s trial, which has a much lower RSD than the first 45 s  
364 trial (17% vs. 40%) has a half-life similar to that observed for *A. ocellaris*. The goal of the  
365 second trial was to establish when control levels were reached, and because of this, there were  
366 fewer early time points sampled. Trial 1 CN exposures have more sampling data points at early  
367 time points, resulting in a better fit of the elimination from the blood plasma rather than the  
368 terminal half-life.

369 SCN concentration for *A. ocellaris* plateaued between two and four days at approximately 500  
370 ppb for both 20 and 45 s exposure times (Breen et al. 2019). In the first trial of the current study,  
371 the SCN concentration plateaued between four and 12 hours at approximately 150 ppb for both  
372 exposure times, likely due to the faster half-life and likely lower dose of CN ingested.

373 Vaz et al. (2012) exposed *A. clarkii* ( $1.8 \pm 0.2$  g) to 25 ppm CN for 60 seconds and reported a  
374 33% mortality rate. We did not observe any mortality when fish were exposed to CN  
375 concentrations of 50 ppm CN for 45 seconds. However, this difference in vulnerability could be  
376 due to differences in fish size, health or stress level (Hanawa et al. 1998). When assessing the  
377 vulnerability of *A. ocellaris* to CN, Madeira et al. (2020) found that larger fish had a higher

378 Table 3. Summary of SCN half-lives in fish exposed to CN or SCN including relative standard  
 379 deviation (RSD) and average fish weight. Summary of max concentration of SCN observed in  
 380 fish exposed to CN or SCN.

| Model species                   |                     | CN 20 s<br>trial 1 | CN 45 s<br>trial 1 | CN 45 s<br>trial 2 | SCN<br>chronic | Reference              |
|---------------------------------|---------------------|--------------------|--------------------|--------------------|----------------|------------------------|
| <i>Amphiprion<br/>ocellaris</i> | Half-life<br>(days) | 0.44 ± 0.15        | 1.01 ± 0.26        | NA                 | 0.35 ± 0.07    | (Breen et al.<br>2019) |
|                                 | RSD                 | 34%                | 26%                |                    | 20%            |                        |
|                                 | Mass<br>(g)         | 5.68 ± 1.42        | 5.03 ± 1.41        |                    | 3.84 ± 0.59    |                        |
|                                 | Max. Conc<br>(ppm)  | 1.9 ± 0.6          | 2.3 ± 0.2          |                    | 220 ± 31       |                        |
| <i>Amphiprion clarkii</i>       | Half-life<br>(days) | 0.20 ± 0.06        | 0.10 ± 0.04        | 1.2 ± 0.2          | 0.13 ± 0.02    | Current study          |
|                                 | RSD                 | (30%)              | (40%)              | (17%)              | (15%)          |                        |
|                                 | Mass<br>(g)         | 3.07 ± 0.62        | 3.54 ± 0.78        | 12.84 ±<br>9.37    | 6.09 ± 2.72    |                        |
|                                 | Max. Conc<br>(ppm)  | 0.301 ±<br>0.066   | 0.468 ±<br>0.028   | 0.399 ±<br>0.060   | 44 ± 2.5       |                        |
| <i>Oncorhynchus<br/>mykiss</i>  | Half-life<br>(days) | NA                 |                    |                    | 2.02 ± 0.06    | (Brown et al.<br>1995) |
|                                 | RSD                 |                    |                    |                    | 3%             |                        |
|                                 | Mass<br>(g)         |                    |                    |                    | 20             |                        |
|                                 | Max. Conc<br>(ppm)  |                    |                    |                    | 60.5 ± 6.2     |                        |

382 survival rate and quicker recovery time when exposed for the same time and concentration of CN  
383 as their smaller conspecifics . As the fish used in this study were larger, a lower mortality rate  
384 would be expected.

385

### 386 **SCN Exposure**

387 As with the CN exposure, when the results for *A. clarkii* are compared with those previously  
388 reported for *A. ocellaris*, the SCN blood plasma level was much lower. Both species were  
389 exposed to 100 ppm SCN bath for 11-12 days, but the maximum SCN blood plasma was 44 ppm  
390  $\pm 2.5$ , while that for *A. ocellaris* was at 220 ppm  $\pm 31$  (Table 3). The SCN levels in the blood  
391 plasma of *A. clarkii* were half that of the exposure bath, while those observed for *A. ocellaris*  
392 were twice that of the exposure bath. It appears that even under different exposure conditions  
393 (pulsed CN versus chronic SCN), *A. clarkii* have lower levels of SCN in their bloodstream,  
394 indicating that they are up-taking less CN/SCN during exposure than *A. ocellaris* or eliminating  
395 SCN from their blood more efficiently.

396 The half-life for SCN clearance in the blood plasma measured for *A. clarkii* when chronically  
397 exposed to SCN is 63% faster when compared to *A. ocellaris*. In a similar experiment on the  
398 freshwater fish rainbow trout (*Oncorhynchus mykiss*) the reported half-life for clearance of SCN  
399 from their blood was 2.02 or 2.36 days depending on the model used (Brown et al. 1995). This is  
400 much slower than our reported value of  $0.13 \pm 0.02$  days and could reflect the differences in the  
401 osmoregulatory systems of marine versus freshwater fish.

402

### 403 **Aquarium Water**

404 Failure to replicate the work of Vaz et al. (2012) calls to question the ultimate fate of CN and  
405 SCN in marine fish. We have now confirmed in two marine species that CN is converted to SCN  
406 quickly as evidenced by the rapid rise of SCN in the blood plasma following CN exposure in  
407 accordance with the mammalian model. The clearance rate of SCN from the blood plasma is also  
408 quick, with the highest levels depleted in a few days after CN exposure, also in accordance with  
409 mammalian models. However, the question remains where does the SCN go? Is the failure to



410 detect SCN in the aquarium water of marine fish post-acute exposure to CN because they are not  
411 excreting it, or is it because any excretion by a small fish in a relatively large quantity of water is  
412 diluted to concentrations below the detection limit?

413 Blood plasma levels of SCN following acute exposure to CN were found to be in the range 0.4 –  
414 2 ppm at their maximum and only for a day or two after exposure. Levels above this are unlikely  
415 as higher CN doses would be required, leading to an increase in mortality rather than higher  
416 levels of SCN in the blood plasma. In order to enhance detection capabilities by increasing the  
417 SCN in the blood plasma, which presumably would lead to higher levels of SCN in the urine if  
418 dilution was the limiting factor, *A. clarkii* were exposed to 100 ppm SCN for 12 days,  
419 presumably completely saturating the fish. Under such conditions, blood plasma levels were  
420 found to be close to 50 ppm for *A. clarkii*, approximately 25 times higher than the highest SCN  
421 concentration observed in CN exposed fish. These fish were placed in 500 mL of aquarium water  
422 to depurate, a volume three times smaller than the 1.5 L used by Vaz et al. (2012). It was  
423 believed that higher SCN blood plasma levels as compared to CN exposure and the smaller  
424 aquarium water volume used in depuration should increase the likelihood of observing SCN in  
425 the aquarium water. In fact, SCN was detected in the aquarium water of the depurating fish, a  
426 maximum was observed close to 40 ppb two hours after depuration began. However, after this  
427 initial observation, SCN concentration steadily decreased until the first water change at 24 hours  
428 where it reached LOD. Sampling continued before each water change for three days, but no  
429 further SCN was detected in the aquarium water. These results demonstrate that *A. clarkii* have  
430 the capability of absorbing low levels of SCN, likely through their drinking response. We  
431 speculate that the source of the SCN we detected two hours after introducing the fish to the  
432 beaker is possibly due to diffusion out of the slime coat and not via urinary excretion, as no other  
433 SCN was observed at later times. Once the SCN is introduced to the aquarium water from the  
434 slime coat, it is then absorbed by the fish via the drinking response. However, drinking rates in  
435 marine fish have been reported to range from 2-7 mL/kg per hour making it unlikely for the fish  
436 to drink 500 mL of aquarium water in less than 24 hours. (Perrott et al. 1992; Fuentes & Eddy  
437 1997; Grosell 2019).

438 Given that the time scale (~ 20 hours) for SCN blood plasma clearance and for SCN aquarium  
439 water clearance are similar (Fig. 2, Fig. 3), it is also possible that most of the SCN absorbed in

440 the chronic exposure may have been rapidly excreted. Then after the initial 24 hours, further  
441 excretion is too low to detect or the rate of reabsorption exceeds that of excretion for the  
442 following three days. However, this scenario is less likely since SCN is continually and rapidly  
443 eliminated from the blood plasma for the first 12 hours of depuration, not just the first two hours.

444 Our results testing SCN in aquarium water is the reverse of those of Vaz et al. (2012). In their  
445 study, they did not observe any SCN in aquarium water in the first 24 hours post-acute exposure  
446 to CN but then observed a steady increase of SCN concentration in aquarium water up until 28  
447 days post-exposure. Our results show that there was no continual SCN excretion even after  
448 chronic exposure to SCN, but rather, low-level absorption was observed. This observation was  
449 unexpected but was further confirmed in the subsequent experiment where fish were placed in  
450 aquarium water that was spiked with SCN.

451 It has been previously speculated that SCN was excreted out of the fish via urine following CN  
452 exposure (Vaz et al. 2012) into the surrounding water to eliminate the ion from the body as in  
453 mammalian models (Lanno & Dixon 1996; Nelson 2006; Logue et al. 2010). However, the data  
454 presented here suggest that, not only is SCN not excreted by *A. clarkii*, but that the fish will  
455 uptake low doses of SCN from the holding water and retain SCN. This further corroborates the  
456 findings that testing for SCN in the holding water of this fish is not a viable indicator of CN  
457 exposure (Herz et al. 2016; Breen et al. 2018), opposing the previous studies (Vaz et al. 2012;  
458 Vaz et al. 2017). This also nullifies any concern of false positives from non-exposed fish up-  
459 taking SCN during cohabitation with exposed fish excreting SCN in aquarium water. However,  
460 this may raise concern of fish uptaking SCN in aquarium water contaminated with SCN from  
461 other sources.

462 This difference in SCN metabolism compared to mammalian models may be due to the  
463 osmoregulation strategy of marine fish. To maintain osmotic balance with the surrounding water,  
464 marine fish have a relatively low urinary excretion rate in order to retain water in their blood.  
465 Urine flow rates in marine teleosts are minimal at 1–2% of body weight daily because water is  
466 highly conserved and can be reabsorbed by the urinary bladder (Evans 1993). This lends further  
467 support to the claim that any SCN in the aquarium water during depuration after chronic  
468 exposure to SCN was likely due to its release from the slime coat of the fish. Most of the  
469 components in the saltwater that fish ingest are absorbed by the esophagus and intestine. Certain

470 excess ions such as Na<sup>+</sup>, Cl<sup>-</sup>, and K<sup>+</sup> that are absorbed by the gut are expelled from the body by  
471 specialized, mitochondria-rich cells called chloride cells (Greenwell et al. 2003). The divalent  
472 ions such as Mg<sup>2+</sup> and SO<sub>4</sub><sup>2-</sup> are excreted in the feces (Hickman Jr 1968). However, the excretion  
473 pathway or terminal fate of SCN ions in the body of marine fish remains unknown.

474 The results of the *A. clarkii* half-life assessments indicate a two-compartment model for SCN  
475 elimination similar to that of *A. ocellaris* (Toutain & Bousquet-mélou 2004). Two-compartment  
476 models are commonly used in pharmaceutical research for drug metabolism (Metzler 1971). As  
477 CN is absorbed through the gills and/or the gut via the drinking response, it is metabolized into  
478 SCN, and the SCN concentration increases in the blood plasma of the fish (Breen et al. 2019).  
479 We observed that SCN is rapidly eliminated from the plasma. SCN blood plasma levels dropped  
480 while depurating for 72 hours after exposure to 100 ppm SCN and stayed the same after being  
481 introduced to SCN spiked aquarium water after 24 hours and 48 hours after a second spike after  
482 the 24 hour sampling. Aquarium water data demonstrates that SCN is not leaving the fish,  
483 therefore it may be entering another compartment within the fish's body. The fish's tissue may  
484 be acting as a SCN reservoir.

485 SCN stored in the tissue of fish could also serve as a potentially longer post-exposure indicator  
486 of CN exposure but further research on the half-life of SCN in the tissue of marine fish exposed  
487 to CN would need to be conducted. This study provides a good starting point for discussion and  
488 further research.

489 In order to properly validate a CN detection method utilizing SCN, it would also be critical to  
490 know the baseline values of SCN in the blood and tissue of non-cyanide caught fish from the  
491 areas where CN is likely used. Fish in these areas may be exposed to very low concentrations of  
492 CN from natural sources such as cyanogenic foods therefore already containing SCN in blood  
493 and tissues. Knowing this information will reduce the potential for false positives. The present  
494 findings confirm the blood plasma SCN maybe be a useful biomarker of CN exposure in marine  
495 fish if measured shortly after exposure. Additional species from a broader taxonomic sample  
496 must be evaluated prior to any definitive conclusions.

497

498

499 ACKNOWLEDGEMENTS

500

501 This work was funded in part by the Pet Industry Joint Advisory Council. We would like to  
502 thank the current and former undergraduates from Roger Williams University who have been  
503 involved in this project especially, Julia Grossman, Gabbie Baillargeon, Hannah Sterling, Natalie  
504 Danek, Julia Dwyer, and Sara Hunt. Kevin Erickson of MASNA provided thoughtful comments  
505 on an earlier draft of this manuscript. Sea & Reef Aquaculture of Maine U.S.A. provided a  
506 portion of the fish used in these experiments.

507

508 REFERENCES

509

- 510 Balboa CM. 2017. Mission interference: How competition confounds accountability for  
511 environmental nongovernmental organizations. *Review of Policy Research* 34:110-131.
- 512 Barber CV, and Pratt VR. 1997. Sullied seas: Strategies for combating cyanide fishing in  
513 Southeast Asia and beyond.
- 514 Bellwood D. 1981. Cyanide... An investigation into the long term histological effects of sodium  
515 cyanide doses upon the gastro-intestinal tract of *Dascyllus trimaculatus*. Part One & Part  
516 Two. *Freshwater and Marine Aquarium* 4:31-35.
- 517 Breen NE, Bonanno JA, Hunt S, Grossman J, Brown J, Nolte H, and Rhyne AL. 2019. On the  
518 half-life of thiocyanate in the plasma of the marine fish *Amphiprion ocellaris*:  
519 implications for cyanide detection. *PeerJ* 7:e6644.
- 520 Breen NE, Lowenstein J, Metivier R, Andrade L, and Rhyne AL. 2018. Can excreted thiocyanate  
521 be used to detect cyanide exposure in live reef fish? *PLoS one* 13.
- 522 Brown D, Lanno RP, Vandenheuevel MR, and Dixon DG. 1995. HPLC determination of plasma  
523 thiocyanate concentrations in fish blood: application to laboratory pharmacokinetic and  
524 field-monitoring studies. *Ecotoxicology and environmental safety* 30:302-308.
- 525 Bruckner AW, and Roberts GG. 2008. Proceedings of the Cyanide Detection Testing Workshop.
- 526 Bruno JF, and Selig ER. 2007. Regional decline of coral cover in the Indo-Pacific: timing,  
527 extent, and subregional comparisons. *PLoS one* 2.
- 528 Burke L, Reytar K, Spalding M, and Perry A. 2011. *Reefs at risk revisited*. Washington, D.C.:  
529 World Resources Institute.
- 530 Calado R, Leal MC, Vaz MC, Brown C, Rosa R, Stevenson TC, Cooper CH, Tissot BN, Li YW,  
531 and Thornhill DJ. 2014. Caught in the Act: How the US Lacey Act can hamper the fight  
532 against cyanide fishing in tropical coral reefs. *Conservation Letters* 7:561-564.
- 533 Cervino JM, Hayes RL, Honovich M, Goreau TJ, Jones S, and Rubec PJ. 2003. Changes in  
534 zooxanthellae density, morphology, and mitotic index in hermatypic corals and anemones  
535 exposed to cyanide. *Marine Pollution Bulletin* 46:573-586.
- 536 Dalabajan D. 2005. Fixing the broken net: Improving enforcement of laws regulating cyanide  
537 fishing in the Calamianes Group of Islands, Philippines. *SPC Live Reef Fish Information*  
538 *Bulletin* 15:3-12.

- 539 Davis S, Murray J, and Katsiadaki I. 2017. Cyanide in the aquatic environment and its  
540 metabolism by fish. *A Report to Ornamental Aquatic Trade Association, UK.*
- 541 Day B, Borowitz J, Mukhopadhyay S, and Isom G. 2018. Sulfurtransferase enzymes involved in  
542 cyanide metabolism.
- 543 Erdmann MV. 1999. Clove oil: an 'eco-friendly' alternative to cyanide use in the live reef fish  
544 industry. *SPC Live Reef Fish Information Bulletin* 5:4-7.
- 545 Evans D. 1993. Osmotoc and ionic regulation. *The Physiology of Fishes*. CRC Press, Boca  
546 Raton, FL.
- 547 Frey J. 2013. A community-based approach to sustainable ornamental fishing on coral reefs,  
548 Bali, Indonesia.
- 549 Fuentes J, and Eddy F. 1997. Drinking in marine, euryhaline and freshwater teleost fish. *Ionic*  
550 *Regulation in Animals: A Tribute to Professor WTW Potts*: Springer, 135-149.
- 551 Graham T. 2001. A collaborative strategy to address the live reef food fish trade. *World*  
552 *Resources Institute, The Nature Conservancy, International Marinelife Alliance, and the*  
553 *MacArthur Foundation, Washington DC.*
- 554 Greenwell MG, Sherrill J, and Clayton LA. 2003. Osmoregulation in fish. Mechanisms and  
555 clinical implications. *The veterinary clinics of North America Exotic animal practice*  
556 6:169-189, vii.
- 557 Grosell M. 2019. Intestinal transport processes in marine fish osmoregulation. *Fish*  
558 *Osmoregulation*:333.
- 559 Hall K, and Bellwood DR. 1995. Histological effects of cyanide, stress and starvation on the  
560 intestinal mucosa of *Pomacentrus coelestis*, a marine aquarium fish species. *Journal of*  
561 *fish biology* 47:438-454.
- 562 Hanawa M, Harris L, Graham M, Farrell AP, and Bendell-Young L. 1998. Effects of cyanide  
563 exposure on *Dascyllus aruanus*, a tropical marine fish species: lethality, anaesthesia and  
564 physiological effects. *Aquarium Sciences and Conservation* 2:21-34.
- 565 Herz N, Ferse S, Alfiansah YR, and Kunzmann A. 2016. High-performance liquid  
566 chromatography to detect thiocyanate in reef fish caught with cyanide: A practical field  
567 application. *SPC Live Reef Fish Information Bulletin* 21:8-16.
- 568 Hickman Jr CP. 1968. Ingestion, intestinal absorption, and elimination of seawater and salts in  
569 the southern flounder, *Paralichthys lethostigma*. *Canadian journal of zoology* 46:457-  
570 466.
- 571 Hughes TP, Barnes ML, Bellwood DR, Cinner JE, Cumming GS, Jackson JB, Kleypas J, Van De  
572 Leemput IA, Lough JM, and Morrison TH. 2017. Coral reefs in the Anthropocene.  
573 *Nature* 546:82-90.
- 574 Jones RJ, and Hoegh-Guldberg O. 1999. Effects of cyanide on coral photosynthesis: implications  
575 for identifying the cause of coral bleaching and for assessing the environmental effects of  
576 cyanide fishing. *Marine Ecology Progress Series* 177:83-91.
- 577 Lanno RP, and Dixon DG. 1996. The comparative chronic toxicity of thiocyanate and cyanide to  
578 rainbow trout. *Aquatic toxicology* 36:177-187.
- 579 Lewis WM, and Tarrant Jr RM. 1960. Sodium cyanide in fish management and culture. *The*  
580 *Progressive Fish-Culturist* 22:177-180.
- 581 Logue BA, Hinkens DM, Baskin SI, and Rockwood GA. 2010. The analysis of cyanide and its  
582 breakdown products in biological samples. *Critical Reviews in Analytical Chemistry*  
583 40:122-147.

- 584 Losada S, and Bersuder P. 2017. Methods of detecting cyanide, thiocyanate and other by-  
585 products in seawater.
- 586 Mak KK, Yanase H, and Renneberg R. 2005. Cyanide fishing and cyanide detection in coral reef  
587 fish using chemical tests and biosensors. *Biosensors and Bioelectronics* 20:2581-2593.
- 588 Madeira D, Andrade J, Leal MC, Ferreira V, Rocha RJM, Rosa R and Calado R. 2020.  
589 Synergistic Effects of Ocean Warming and Cyanide Poisoning in an Ornamental Tropical  
590 Reef Fish. *Frontiers in Marine Science*.
- 591 Manipula BE, Suplido ER, and Astillero NM. 2001. Standard Operating Procedures For Cyanide  
592 Testing Used By The Philippines Cyanide Detection Test (CDT) Network. . *Philippines*  
593 *Department of Agriculture-Bureau of Fisheries and Aquatic Resources/International*  
594 *Marinelife Alliance*.
- 595 Metzler CM. 1971. Usefulness of the two-compartment open model in pharmacokinetics.  
596 *Journal of the American Statistical Association* 66:49-53.
- 597 Murray JM, Bersuder P, Davis S, and Losada S. 2020. Detecting illegal cyanide fishing:  
598 Establishing the evidence base for a reliable, post-collection test. *Marine Pollution*  
599 *Bulletin* 150:110770.
- 600 Nelson L. 2006. Acute cyanide toxicity: mechanisms and manifestations. *Journal of Emergency*  
601 *Nursing* 32:S8-S11.
- 602 Pearce F. 2003. Cyanide: an easy but deadly way to catch fish. Available at  
603 [https://www.panda.org/wwf\\_news/?5563/Cyanide-an-easy-but-deadly-way-to-catch-fish](https://www.panda.org/wwf_news/?5563/Cyanide-an-easy-but-deadly-way-to-catch-fish).
- 604 Perrott M, Grierson C, Hazon N, and Balment R. 1992. Drinking behaviour in sea water and  
605 fresh water teleosts, the role of the renin-angiotensin system. *Fish Physiology and*  
606 *Biochemistry* 10:161-168.
- 607 Pyle RL. 1993. Marine aquarium fish. Nearshore marine resources of the South Pacific Suva:  
608 Institute of Pacific Studies, Honiara: Forum Fisheries Agency, and Canada: International  
609 Centre for Ocean Development. p 135-176.
- 610 Reaka-Kudla ML. 1997. The global biodiversity of coral reefs: a comparison with rain forests.  
611 *Biodiversity II: Understanding and protecting our biological resources* 2:551.
- 612 Rhyne AL, Tlusty MF, Szczebak JT, and Holmberg RJ. 2017. Expanding our understanding of  
613 the trade in marine aquarium animals. *PeerJ* 5:e2949.
- 614 Rong L, Lim L, and Takeuchi T. 2005. Determination of iodide and thiocyanate in seawater by  
615 liquid chromatography with poly (ethylene glycol) stationary phase. *Chromatographia*  
616 61:371-374.
- 617 Rubec PJ. 1986. The effects of sodium cyanide on coral reefs and marine fish in the Philippines.  
618 The First Asian Fisheries Forum: Manila, Philippines: Asian Fisheries Society. p 297-  
619 302.
- 620 Rubec PJ, Cruz F, Pratt V, Oellers R, McCullough B, and Lallo F. 2001. Cyanide-free net-caught  
621 fish for the marine aquarium trade. *Aquarium Sciences and Conservation* 3:37-51.
- 622 Rubec PJ, Pratt VR, McCullough B, Manipula B, Alban J, Espero T, and Supildo E. 2008.  
623 Trends determined by cyanide testing on marine aquarium fish in the Philippines. *Marine*  
624 *ornamental species: collection, culture and conservation*:327-340.
- 625 Toutain P-L, and Bousquet-mélou A. 2004. Plasma terminal half-life. *Journal of veterinary*  
626 *pharmacology and therapeutics* 27:427-439.
- 627 Vaz MC, Esteves VI, and Calado R. 2017. Live reef fish displaying physiological evidence of  
628 cyanide poisoning are still traded in the EU marine aquarium industry. *Scientific reports*  
629 7:1-5.

630 Vaz MC, Rocha-Santos TA, Rocha RJ, Lopes I, Pereira R, Duarte AC, Rubec PJ, and Calado R.  
631 2012. Excreted thiocyanate detects live reef fishes illegally collected using cyanide—a  
632 non-invasive and non-destructive testing approach. *PLoS one* 7.  
633 Youso SL, Rockwood GA, and Logue BA. 2012. The analysis of protein-bound thiocyanate in  
634 plasma of smokers and non-smokers as a marker of cyanide exposure. *Journal of*  
635 *analytical toxicology* 36:265-269.

636

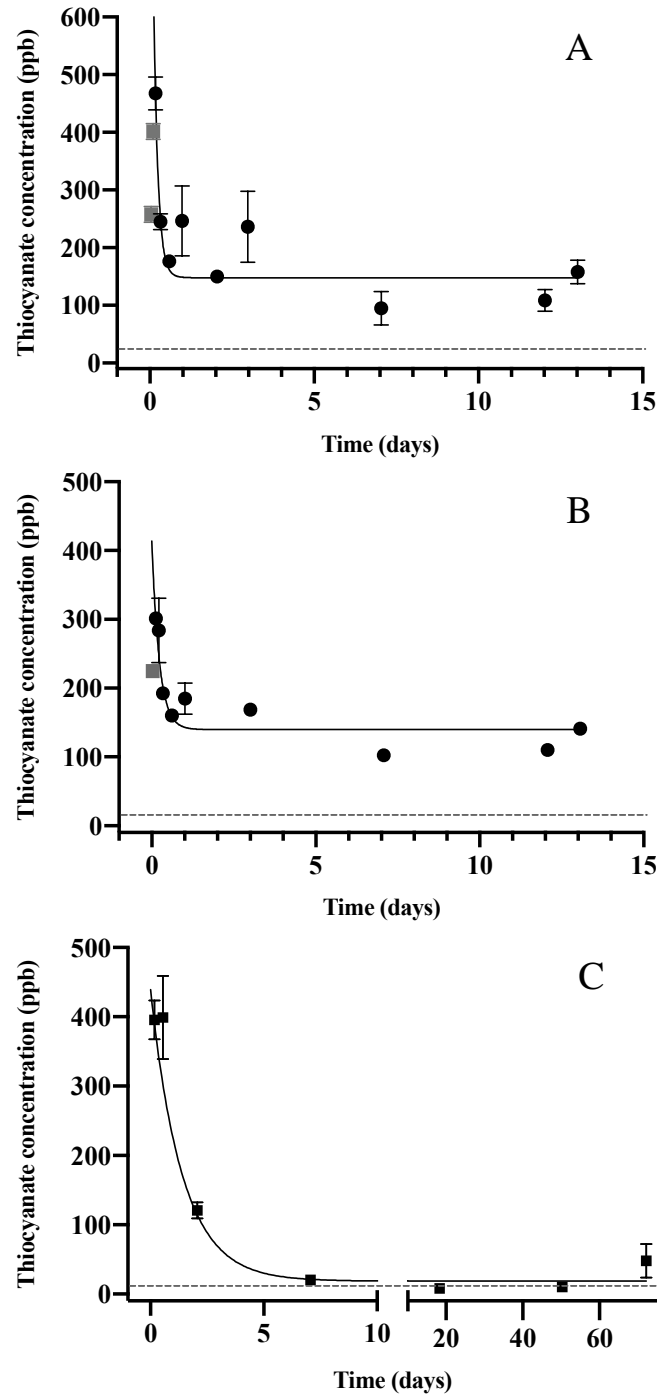

Figure 1. The SCN plasma concentration during depuration in *Amphiprion clarkii* after exposure to 50 ppm CN for trial 1 (A) 45 s and (B) 20 s with sampling out to 13 days and trial 2 (C) 45 s with sampling out to 72 days. The black solid line represents the fit of the data to a single-phase exponential decay function. Gray data points represent early time points where SCN plasma levels are increasing and are therefore not included in the fit. Each data point indicates the mean  $\pm$  S.E. The dashed gray line represents the average SCN concentration (SCN Conc. > 34 ppb  $\pm$  10) in control fish. Where no error bar is observed the error is smaller than the data point.



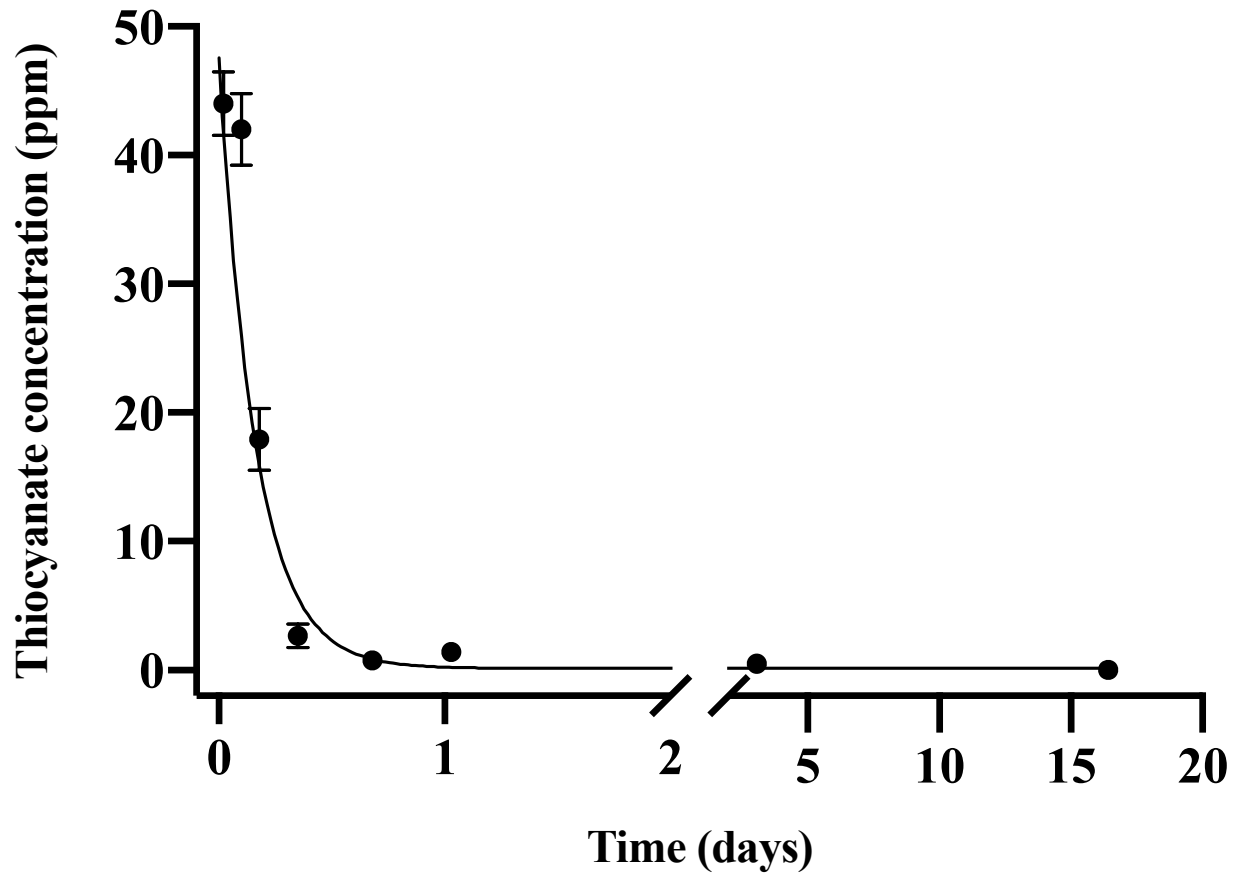

Figure 2. The plasma SCN concentration during depuration for *Amphiprion clarkii* after exposure to 100 ppm SCN for 12 days. The black solid line represents the fit of the data to a single-phase exponential decay function. Each data point indicates the mean  $\pm$  S.E. Where no error bar is observed the error is smaller than the data point.

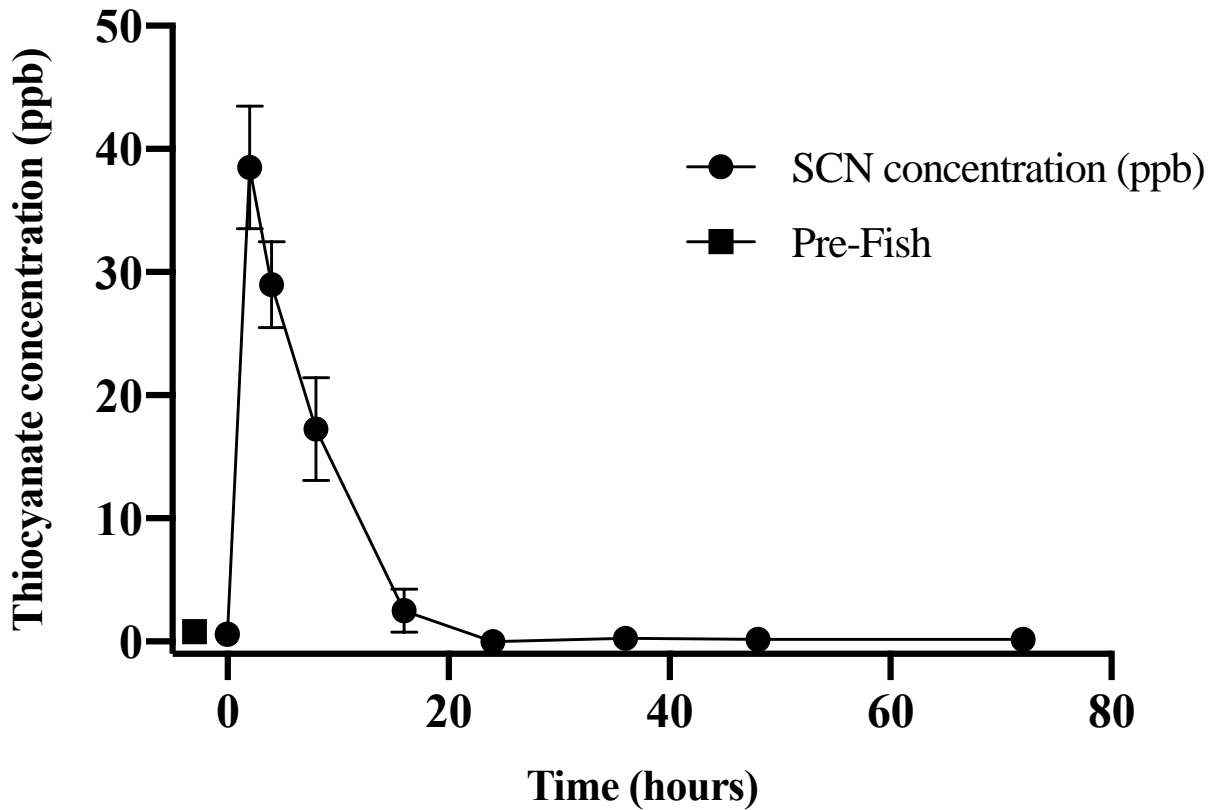

Figure 3. The average (n=10) concentration of SCN (ppb) of 15-L aquarium water, each containing a single *Amphiprion clarkii* depurating after exposure to 100 ppm SCN for 12 days. The data points indicate the mean  $\pm$  S.E of the SCN concentration. Circles are samples once depuration had begun, the square indicates the measured SCN in the aquarium water prior to the addition of the fish. Where no error bar is observed the error is smaller than the data point.

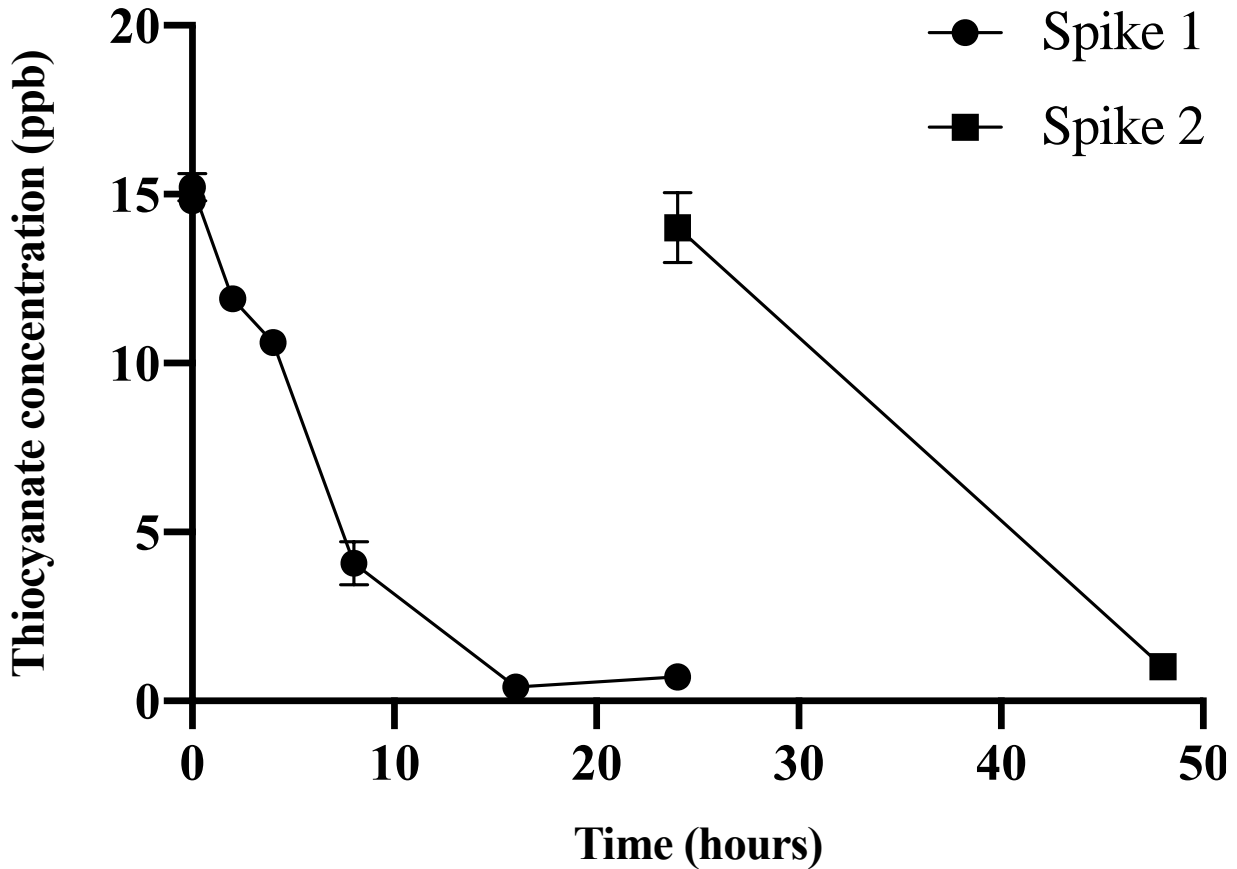

Figure 4. Average (n=10) SCN concentration of 500 mL aquarium water spiked with SCN containing 1 non-exposed *Amphiprion clarkii*. Each data point indicates the mean  $\pm$  S.E. Where no error bar is observed the error is smaller than the data point. The round data points indicate the data collected after the first SCN spike and the square data points show that data after a water change and a second 20 spike.
